# Supplementary material for: Influence of temperature on developmental and biochemical traits of the red squat lobster Grimothea monodon (H. Milne Edwards, 1837) during early ontogeny
Source: PeerJ. 2025 Oct 22;13:e20278. doi: 10.7717/peerj.20278 (PMC12553365; doi:10.7717/peerj.20278)
Supplement: Supplemental Information 1 [file peerj-13-20278-s001.xlsx]

## Sheet: Development time
TEMPERATURE: 12°C
	H1F1		H1F2		H2F1		H2F2		H2F3		H2F4		H2F5		H2F6		H5F1		H5F2		H5F3
	MIN	MAX	MIN	MAX	MIN	MAX	MIN	MAX	MIN	MAX	MIN	MAX	MIN	MAX	MIN	MAX	MIN	MAX	MIN	MAX	MIN	MAX
Zoea I	8	15	8	16	3		8	14	7	19	8	17	8	14	8	14	10	19	9	17	17	22
Zoea II	16	22	16	26			19	20	16	22	16	30	16	33	15		19	34	19	35	24	25
Zoea III	25	30	24	32			28	29	28		24	33	25	33			28	48	27	47	34	35
Zoea IV-A	32	53	53	54			33	34			32	47	32	40			40	67	46	66	55	56
Zoea IV-A (*)			53	68													42	80
Zoea IV-B	40	61	40	76			42	43			40	62	42	49			58	89	47	78	62	63
Zoea IV-C	49	65	49	90			51	52			49	67	49	49			81	89	55	104	71	72
Zoea IV-C (*)																	81	89
Zoea IV-D	58	65	59	94			60	61			60	75	58	68					65	104	80	81
Zoea IV-E	70	75	70	102			72	73			71	92	68	72					74	104	93	94
Zoea V	83		102	106			86	87			91	110	78						86	104	110	111
Zoea VI											110								107	110
Megalopa																			110
Zoea IV-A (*)	possible response of phenotypic plasticity
Zoea IV-C (*)
TEMPERATURE: 20°C
	H1F1		H1F2		H2F1		H2F2		H2F3		H2F4		H2F5		H2F6		H5F4		H5F5		H5F6
	MIN	MAX	MIN	MAX	MIN	MAX	MIN	MAX	MIN	MAX	MIN	MAX	MIN	MAX	MIN	MAX	MIN	MAX	MIN	MAX	MIN	MAX
Zoea I	5	12	5	12	5	13	5	13	4	7	5	15	5	14	5	9	7	17	13		7	15
Zoea II	11	19	9	19	11	23	11	19	9	11	9	19	11	16	11	12	12	22			12	26
Zoea III	14	31	13	30	14	25	14	24	12		13	30	15	35	14	21	17	22			22	36
Zoea IV-A	19	52	19	49	19	41	19	30			17	47	19	47	20	21	21	22			32	47
Zoea IV-B	24	60	23	52	25	43	23	43			21	64	24	48	24	25	34	35			41	56
Zoea IV-C	31	72	30	75	30	60	30	61			30	74	31	50	30	31	42	43			48	72
Zoea IV-D	39	74	36	75	36	74	34	76			34	77	40	55	36	39	58				74	75
Zoea IV-E	52	81	42	79	42	82	41	77			40	81	47	64	44	51					82	91
Zoea V	65	81	58	87	56	82	51	80			47	91	57	83	52	70					91	92
Zoea VI			60	87	54	82	54	91			58	81	83		66	70
Megalopa	68		70		54	82	91				91				67

## Sheet: Mortality percentage
	Mortality percentage
Days	12 °C	20 °C
0	0	0
1	2	8
2	12.9091	14
3	21.2727	18.3636
4	25.6364	21.8182
5	26.9091	23.8182
6	34	29.0909
7	35.4545	32.1818
8	37.8182	36
9	40.3636	38.5455
10	40.7273	38.7273
11	42.3636	41.0909
12	44.5455	45.6364
13	54.3636	48.3636
14	65.0909	51.6364
15	72.1818	53.0909
16	72.5455	53.4545
17	74.7273	55.6364
18	74.7273	55.6364
19	76.9091	57.8182
20	77.4545	59.2727
21	78	60
22	79.6364	60.3636
23	81.0909	60.7273
24	84	60.9091
25	84.9091	61.0909
26	85.4545	61.2727
27	85.4545	61.2727
28	87.2727	61.6364
29	87.2727	61.6364
30	88.7273	63.0909
31	89.0909	63.2727
32	89.4545	65.4545
33	89.6364	67.6364
34	90.1818	67.8182
35	90.3636	68.1818
36	90.3636	68.5455
37	90.5455	68.5455
38	90.7273	68.5455
39	90.9091	68.9091
40	91.6364	68.9091
41	91.8182	68.9091
42	91.8182	68.9091
43	91.8182	68.9091
44	92	69.2727
45	92	69.2727
46	92	69.2727
47	92	70
48	92.1818	70
49	92.7273	70.5455
50	93.2727	70.9091
51	93.2727	70.9091
52	93.2727	71.2727
53	93.2727	71.4545
54	93.2727	72
55	93.4545	72.3636
56	93.8182	73.4545
57	93.8182	73.8182
58	93.8182	74
59	93.8182	74.5455
60	93.8182	75.0909
61	93.8182	76
62	93.8182	76.7273
63	93.8182	77.2727
64	94.1818	78.5455
65	94.1818	79.4545
66	94.1818	80.5455
67	94.1818	81.4545
68	94.1818	82.9091
69	94.1818	83.6364
70	94.1818	85.4545
71	94.1818	86.7273
72	94.1818	88.3636
73	94.3636	90.1818
74	94.3636	91.8182
75	94.3636	93.4545
76	94.3636	93.6364
77	94.3636	94.7273
78	94.7273	95.0909
79	94.9091	95.2727
80	95.0909	96.5455
81	95.0909	97.6364
82	95.0909	97.8182
83	95.4545	98.1818
84	95.4545	98.5455
85	95.6364	98.5455
86	95.8182	98.7273
87	95.8182	99.2727
88	96.1818	99.2727
89	96.5455	99.2727
90	96.9091	99.2727
91	96.9091	100
92	96.9091
93	97.0909
94	97.2727
95	97.2727
96	97.6364
97	97.8182
98	98.1818
99	98.1818
100	98.3636
101	98.5455
102	98.5455
103	98.5455
104	98.9091
105	98.9091
106	99.2727
107	99.2727
108	99.2727
109	99.2727
110	100

## Sheet: LCap_larva
Temperature	Larval stage	Lcap (mm)		Lcap = carapace lenght
20 °C	ST1	0.659045
20 °C	ST1	0.631303
20 °C	ST1	0.669317
20 °C	ST1	0.668315
20 °C	ST1	0.677269
20 °C	ST1	0.65104
20 °C	ST1	0.646211
20 °C	ST1	0.640244
20 °C	ST1	0.6533
20 °C	ST1	0.604873
20 °C	ST2	0.693403
20 °C	ST2	0.699129
20 °C	ST2	0.71289
20 °C	ST2	0.812862
20 °C	ST2	0.738527
20 °C	ST2	0.726758
20 °C	ST2	0.825341
20 °C	ST2	0.759249
20 °C	ST2	0.81573
20 °C	ST2	0.738135
20 °C	ST3	0
20 °C	ST3	0.810477
20 °C	ST3	0.821531
20 °C	ST3	0.792887
20 °C	ST3	0.862454
20 °C	ST3	0.8107
20 °C	ST3	0.832423
20 °C	ST3	0.905452
20 °C	ST3	0.815878
20 °C	ST3	0.729611
20 °C	ST4A	0.896529
20 °C	ST4A	0.938262
20 °C	ST4A	0.898502
20 °C	ST4A	0.938083
20 °C	ST4A	0.880544
20 °C	ST4A	0.834382
20 °C	ST4A	0.912571
20 °C	ST4A	0.829348
20 °C	ST4A	0.977507
20 °C	ST4A	0.937216
20 °C	ST4B	1.04146
20 °C	ST4B	1.1377
20 °C	ST4B	1.10715
20 °C	ST4B	1.2964
20 °C	ST4B	1.10982
20 °C	ST4B	1.09019
20 °C	ST4B	1.00202
20 °C	ST4B	1.03502
20 °C	ST4B	1.09946
20 °C	ST4B	1.20071
20 °C	ST4C	1.20095
20 °C	ST4C	1.37796
20 °C	ST4C	1.23692
20 °C	ST4C	1.27459
20 °C	ST4C	1.31795
20 °C	ST4C	1.2945
20 °C	ST4C	1.15888
20 °C	ST4C	1.42503
20 °C	ST4C	1.147
20 °C	ST4C	1.26814
20 °C	ST4D	1.36028
20 °C	ST4D	1.41575
20 °C	ST4D	1.38636
20 °C	ST4D	1.56363
20 °C	ST4D	1.36145
20 °C	ST4D	1.33637
20 °C	ST4D	1.45742
20 °C	ST4D	1.40006
20 °C	ST4D	1.36262
20 °C	ST4D	1.39762
20 °C	ST4E	1.36506
20 °C	ST4E	1.42943
20 °C	ST4E	1.40363
20 °C	ST4E	1.48151
20 °C	ST4E	1.59979
20 °C	ST4E	1.6355
20 °C	ST4E	1.5502
20 °C	ST4E	1.42998
20 °C	ST4E	1.4915
20 °C	ST4E	1.61606
20 °C	ST5	1.62419
20 °C	ST5	1.67481
20 °C	ST5	1.80477
20 °C	ST5	1.63843
20 °C	ST5	1.79649
20 °C	ST5	1.67091
20 °C	ST5	1.56729
20 °C	ST5	1.5704
20 °C	ST5	1.61048
20 °C	ST5	1.59232
20 °C	ST6	1.76995
20 °C	ST6	1.76379
20 °C	ST6	1.71222
20 °C	ST6	1.85578
20 °C	ST6	1.81489
20 °C	ST6	1.81897
20 °C	ST6	1.84126
20 °C	ST6	1.78671
20 °C	ST6	1.75359
20 °C	ST6	1.80116
12 °C	ST1	0.746784
12 °C	ST1	0.746247
12 °C	ST1	0.66448
12 °C	ST1	0.649931
12 °C	ST1	0.649643
12 °C	ST1	0.668325
12 °C	ST1	0.698239
12 °C	ST1	0.6036
12 °C	ST1	0.632845
12 °C	ST1	0.760118
12 °C	ST2	0.866443
12 °C	ST2	0.844835
12 °C	ST2	0.796512
12 °C	ST2	0.748514
12 °C	ST2	0.765196
12 °C	ST2	0.736795
12 °C	ST2	0.760255
12 °C	ST2	0.774311
12 °C	ST2	0.823359
12 °C	ST2	0.789504
12 °C	ST3	0.839304
12 °C	ST3	1.07558
12 °C	ST3	0.856321
12 °C	ST3	0.903334
12 °C	ST3	0.835401
12 °C	ST3	0.790379
12 °C	ST3	0.874076
12 °C	ST3	0.890879
12 °C	ST3	0.827448
12 °C	ST3	0.808565
12 °C	ST4A	1.00217
12 °C	ST4A	1.20088
12 °C	ST4A	1.01956
12 °C	ST4A	0.997197
12 °C	ST4A	1.06125
12 °C	ST4A	0.988818
12 °C	ST4A	0.955506
12 °C	ST4A	0.948301
12 °C	ST4A	0.967461
12 °C	ST4A	1.02951
12 °C	ST4B	1.19089
12 °C	ST4B	1.30208
12 °C	ST4B	1.14881
12 °C	ST4B	1.37371
12 °C	ST4B	1.14419
12 °C	ST4B	1.2802
12 °C	ST4B	1.11262
12 °C	ST4B	1.15584
12 °C	ST4B	1.05384
12 °C	ST4B	1.22915
12 °C	ST4C	1.42054
12 °C	ST4C	1.2745
12 °C	ST4C	1.3828
12 °C	ST4C	1.36567
12 °C	ST4C	1.27972
12 °C	ST4C	1.20946
12 °C	ST4C	1.35353
12 °C	ST4C	1.51971
12 °C	ST4C	1.30605
12 °C	ST4C	1.35298
12 °C	ST4D	1.31761
12 °C	ST4D	1.37772
12 °C	ST4D	1.45591
12 °C	ST4D	1.36209
12 °C	ST4D	1.39357
12 °C	ST4D	1.43042
12 °C	ST4D	1.58861
12 °C	ST4D	1.46435
12 °C	ST4D	1.47134
12 °C	ST4D	1.48923
12 °C	ST4E	1.6889
12 °C	ST4E	1.63088
12 °C	ST4E	1.59895
12 °C	ST4E	1.65949
12 °C	ST4E	1.70482
12 °C	ST4E	1.65998
12 °C	ST4E	1.59765
12 °C	ST4E	1.6267
12 °C	ST4E	1.62473
12 °C	ST4E	1.70613
12 °C	ST5	1.71089
12 °C	ST5	1.78079
12 °C	ST5	1.91273
12 °C	ST5	1.75077
12 °C	ST5	1.57759
12 °C	ST5	1.59101
12 °C	ST5	1.70687
12 °C	ST5	1.77674
12 °C	ST5	1.81181
12 °C	ST5	1.74822
12 °C	ST6	1.80093
12 °C	ST6	1.68637

## Sheet: CHN
					Weight (ug) of CHN in 1 larva			Percentage in 1 larva			Ratio in 1 larva
Larval stage	Temperature	Number of individuals	Total sample weight (mg)	Weight 1 larva (ug)	Carbon	Hydrogen	Nitrogen	Carbon	Hydrogen	Nitrogen	Radio C/N	Radio C/H
zoea I	12°C	70	0.559	7.98571	1.96608	0.23478	0.282694	24.62	2.94	3.54	6.9548	8.37415
zoea I	12°C	70	0.46	6.57143	1.8952	0.201743	0.277314	28.84	3.07	4.22	6.83412	9.39414
zoea I	12°C	70	0.6054	8.64857	2.52538	0.30443	0.389186	29.2	3.52	4.5	6.48889	8.29545
zoea I	20°C	60	0.44	7.33333	1.82013	0.192133	0.2904	24.82	2.62	3.96	6.26768	9.47328
zoea I	20°C	70	0.4664	6.66286	2.05882	0.234533	0.327146	30.9	3.52	4.91	6.29328	8.77841
zoea I	20°C	60	0.4747	7.91167	2.49059	0.288776	0.411407	31.48	3.65	5.2	6.05385	8.62466
zoea V	12°C	4	0.86	215	42.656	6.6865	8.299	19.84	3.11	3.86	5.1399	6.37942
zoea V	12°C	4	0.634	158.5	27.4997	4.1844	4.48555	17.35	2.64	2.83	6.13074	6.57197
zoea V	12°C	3	0.654	218	45.4966	7.5864	9.5484	20.87	3.48	4.38	4.76484	5.99713
zoea V	20°C	4	0.9506	237.65	41.5887	6.7255	8.34151	17.5	2.83	3.51	4.98575	6.18375
zoea V	20°C	4	0.7353	183.825	39.4672	5.71696	7.81256	21.47	3.11	4.25	5.05176	6.90354
zoea V	20°C	5	0.764	152.8	34.5634	4.99656	7.15104	22.62	3.27	4.68	4.83333	6.91743
zoea V	20°C	4	0.7303	182.575	38.0486	5.47725	7.13868	20.84	3	3.91	5.32992	6.94667
